# Supplementary material for: Robotic observations of high wintertime carbon export in California coastal waters
Source: Copernicus journal article supplement (doi:10.5194/bg-2016-62), 2016-02-25
Supplement: Supplementary file 1 [file 20160221_Summary_CFE_Fluxes_BiogeosciencesSuppl.Excel_.xlsx]

## Sheet: Sheet1
June 9 2015																		Cross Polarized Data
													NH1301
						NH1301		mATN-cm2 cm-2 d-1					mATN-cm2 cm-2 d-1								ppm-cm2 cm-2 d-1					ppm-cm2 cm-2 d-1
						JAN 2013		1.8 hr	1.8 hr	1.8 hr			Record	Record	Record				NH1301		1.8 hr	1.8 hr	1.8 hr			Record	Record	Record			PIC/POC		PIC/POC
					dive	Bar center (d)	Bar width (d)	Matn Flux B	Matn Flux G	Matn Flux R	DEPTH		Matn Flux B	Matn Flux G	Matn Flux R	DEPTH		dive	Bar center (d)	Bar width (d)	B PL2 Flux	G PL2 flux	R PL2 flux	DEPTH		B PL2 Flux	G PL2 flux	R PL2 flux			G		G	DEPTH
					145	18.487	0.0609	58.4	52.6	46.6	144		74.65	67	59.2167	144		145	18.4872	0.0609	60.9944	74.5348	55.728	144		77.6614	95.716	69.535	144		1.4286		1.41701	144
					145	18.557	0.0765	88.4	79.4	70.2	144		95.06	85.96	76.48	320		145	18.5571	0.0765	84.9772	108.496	78.4487	144		133.343	169.371	122.332	320		1.97035		1.36645	144
					145	18.63	0.0682	83.4	75	66.6	144		39	35.2667	31.1667	506		145	18.6307	0.0682	83.088	104.275	74.8917	144		70.5704	84.1446	63.4206	506		2.38595		1.39034	144
					146	18.776	0.0612	86.7	78.8	70.5	320							146	18.7766	0.0612	131.769	169.297	123.127	320									2.14844	320
					146	18.846	0.0766	100.3	91	81.2	320			in mmol C m-2 d-1				146	18.8467	0.0766	130.327	169.421	121.278	320									1.86177	320
					146	18.92	0.0678	78.6	71.4	63.9	320			187.6				146	18.9201	0.0678	128.043	167.217	117.353	320									2.34197	320
					147	19.123	0.0615	35.5	32.2	28.5	506			240.688				147	19.123	0.0615	59.8619	71.3051	53.4962	506									2.21444	506
					147	19.193	0.0765	45.1	40.7	35.9	506			98.7467				147	19.1932	0.0765	88.2081	103.32	78.5576	506									2.53857	506
					147	19.266	0.0677	36.4	32.9	29.1	506							147	19.2666	0.0677	63.6413	77.809	58.208	506									2.36502	506
					148	19.419	0.061	78.1	69.9	61.5	144							148	19.4198	0.061	79.062	95.1968	71.3293	144									1.3619	144
					148	19.489	0.0766	66.2	59.4	52.4	144							148	19.4897	0.0766	78.2176	95.4397	67.5729	144									1.60673	144
					148	19.563	0.068	73.4	65.7	58	144							148	19.5633	0.068	79.6293	96.3532	69.2391	144									1.46656	144
					149	19.711	0.0616	87	78.3	69.2	320							149	19.7112	0.0616	128.788	155.753	115.5	320									1.98919	320
					149	19.781	0.0766	122.7	110.3	97.6	320							149	19.7815	0.0766	147.789	185.167	134.403	320									1.67876	320
							4.8988																			NH1304
						NH1304		mATN-cm2 cm-2 d-1					NH1304								ppm-cm2 cm-2 d-1					ppm-cm2 cm-2 d-1		Averages
						MAR 2013		1.8 hr	1.8 hr	1.8 hr			mATN-cm2 cm-2 d-1						NH1304		1.8 hr	1.8 hr	1.8 hr			Record	Record	Record			PIC/POC		PIC/POC
					dive	Bar center (d)	Bar width (d)	Matn Flux B	Matn Flux G	Matn Flux R	DEPTH		Matn Flux B	Matn Flux G	Matn Flux R	DEPTH		dive	Bar center (d)	Bar width (d)	B PL2 Flux	G PL2 flux	R PL2 flux	DEPTH		B PL2 Flux	G PL2 flux	R PL2 flux	DEPTH		G		G	DEPTH
					161	86.2388	0.0302875	8.10681	7.30231	6.50029	164		7.70913	7.11171	6.25528	167.6		161	86.2387	0.0302917	32.5546	34.0676	25.0637	164		30.2977	32.9	25.2649	167.6		4.62617		4.66532	164
					161	86.2935	0.0765292	7.63503	7.02316	6.20118	164		6.53532	6.0472	5.31676	264.667		161	86.2934	0.0765167	23.8101	24.7188	17.7158	164		19.8111	21.5217	14.7531	264.667		3.55895		3.51961	164
					161	86.3713	0.0765958	6.45031	5.96993	5.14272	164		6.4768	6.07169	5.46191	508.714		161	86.3712	0.0765833	18.8091	18.7968	14.2808	164		20.3325	22.5369	15.849	508.714		3.71181		3.14858	164
					161	86.4212	0.0207042	18.1227	16.5365	14.3702	164							161	86.4211	0.0206917	59.9178	66.1726	44.3872	164									4.00162	164
					162	86.5534	0.0609375	3.09076	2.85652	2.54023	271			in mmol C m-2 d-1				162	86.5533	0.0609375	12.0163	12.5099	8.54332	271		SD B PL2 Flux	SD G PL2 Flux	SD R PL2 Flux					4.37942	271
					162	86.6234	0.0766333	10.0237	9.27114	8.16735	271			19.9128				162	86.6233	0.0766208	36.7064	39.5015	26.0894	271		19.469	21.6719	17.1579			4.44779		4.26069	271
					162	86.697	0.0680542	4.25139	4.08763	3.55966	271			16.9322				162	86.6969	0.0680417	10.3827	10.6498	7.44528	271		15.7733	17.1108	11.5522			4.0564		2.60537	271
					163	86.9479	0.06095	0.854728	0.739343	0.665492	503			17.0007				163	86.9478	0.06095	2.14739	2.56107	1.65155	503		15.2871	17.6266	11.7785			3.12841		3.46398	503
					163	87.0179	0.0764708	6.66195	6.36348	5.75591	503		mATN-cm2 cm-2 d-1					163	87.0177	0.0764583	23.4857	25.0952	17.8227	503									3.94362	503
					163	87.0914	0.0681583	2.54541	2.61179	2.2287	503		SD B Flux	SD G Flux	SD R Flux			163	87.0913	0.0681458	10.1628	10.4645	7.3526	503									4.00665	503
					164	87.2483	0.061425	5.16294	4.84369	4.28975	173		5.32941	4.87251	4.2829			164	87.2482	0.061425	60.9176	65.9744	56.8439	173									13.6207	173
					164	87.3186	0.0766083	11.3421	10.7477	9.65689	173		4.61193	4.21822	3.7152			164	87.3185	0.0765958	41.1003	46.33	38.8134	173									4.3107	173
					164	87.3919	0.0675917	13.4973	12.3612	10.9156	173		6.02748	5.63437	5.04789			164	87.3918	0.0675792	28.1409	32.5452	21.6952	173									2.63285	173
					165	87.5444	0.0608917	5.88129	5.4563	4.77393	261							165	87.5443	0.0608917	11.5161	13.5138	9.03262	261									2.47673	261
					165	87.6144	0.0765375	16.723	15.3328	13.4872	261							165	87.6143	0.0765292	48.3771	52.6712	35.4704	261	effect of amphipod carapace removed								3.4352	261
					165	87.688	0.0681625	7.0902	6.57894	5.76557	261							165	87.6879	0.06815	25.9911	29.2849	22.0417	261									4.45131	261
					166	87.9039	0.0614125	0.523347	0.384315	0.45478	513							166	87.9038	0.0614125	9.33294	9.51326	8.17236	513									24.7538	513
					166	87.9741	0.076525	14.4985	13.6843	12.4424	513							166	87.974	0.0765167	38.8503	43.1502	30.4872	513									3.15326	513
					166	88.0475	0.0677208	14.8411	13.7223	12.147	513							166	88.0474	0.0677083	42.1714	48.9552	32.395	513									3.56757	513
					167	88.2061	0.0612958	0.884111	0.867021	0.729019	167							167	88.206	0.0612958	1.47903	1.57228	1.19734	167									1.81343	167
					167	88.2762	0.0764792	2.57534	2.39281	2.14083	167							167	88.2761	0.0764708	8.9314	8.61623	7.00965	167									3.60088	167
					167	88.3496	0.0678625	3.31461	3.07278	2.60633	167							167	88.3495	0.06785	27.3163	30.2057	25.6418	167	effect of ciproid barnicle fixed								9.83007	167
					168	88.5073	0.0614458	2.00127	1.86169	1.66895	262							168	88.5072	0.0614458	2.12565	2.37607	1.77788	262									1.2763	262
					168	88.5776	0.0765167	2.60508	2.40301	2.05035	262							168	88.5775	0.0765042	3.67809	4.14931	2.87227	262									1.72671	262
					168	88.6509	0.067625	7.1511	6.57678	5.83766	262							168	88.6508	0.0676167	27.5062	29.039	19.5053	262									4.41537	262
					169	88.8464	0.0612042	5.41258	4.99624	4.53902	513							169	88.8463	0.0612042	16.1772	18.0191	13.0618	513									3.60654	513
																										NH1204	Averages
					CFE001	NH1204		mATN-cm2 cm-2 d-1					mATN-cm2 cm-2 d-1								ppm-cm2 cm-2 d-1					ppm-cm2 cm-2 d-1
						MAY 2012		1.8 hr	1.8 hr	1.8 hr			Record	Record	Record				NH1204		1.8 hr	1.8 hr	1.8 hr			Record	Record	Record			PIC/POC		PIC/POC
					dive	Bar center (d)	Bar width (d)	Matn Flux B	Matn Flux G	Matn Flux R	DEPTH		Matn Flux B	Matn Flux G	Matn Flux R	DEPTH		dive	Bar center (d)	Bar width (d)	B PL2 Flux	G PL2 flux	R PL2 flux	DEPTH		B PL2 Flux	G PL2 flux	R PL2 flux	DEPTH		G		G	DEPTH
					123	151.91	0.0749667	2.52614	2.33115	2.18199	465		1.93924	1.88974	1.71196	431.667		123	151.91	0.0749667	2.6216	2.83775	2.3398	465		2.6832	2.75697	2.20427	431.667		1.45891		1.21732	465
					123	151.995	0.0941	0.925334	0.922871	0.79274	465		2.9595	2.7864	2.4757	673.333		123	151.995	0.0941	0.365967	0.360103	0.278129	465		1.20419	1.21573	1.03969	673.333		0.43631		0.390198	465
					123	152.062	0.0381375	5.72897	5.55096	4.96987	465		1.97763	1.85945	1.68717	897.5		123	152.063	0.0381375	4.50185	5.69214	4.4568	465		0.396758	0.526268	0.441585	897.5		0.283024		1.02543	465
					124	152.247	0.0750667	2.06098	1.92789	1.74208	715							124	152.247	0.0750667	0.81626	0.991306	0.938068	715									0.514191	715
					124	152.333	0.0939375	11.9859	11.108	9.93278	715			in mmol C m-2 d-1				124	152.333	0.0939375	2.37765	2.78109	2.6914	715									0.250368	715
					124	152.4	0.0382083	7.8668	7.41552	6.5947	715			5.29127				124	152.4	0.0382083	4.74816	4.56838	3.71597	715									0.616057	715
					125	152.626	0.0749083	3.33167	2.90934	2.75012	915			7.80192				125	152.626	0.0749083	0.565863	0.611579	0.560767	915		NH1204							0.210212	915
					125	152.711	0.0940875	1.04247	1.05025	0.873011	915			5.20645				125	152.711	0.0940875	0.227451	0.92238	0.574837	915		Time weighted	Averages						0.878248	915
					125	152.778	0.0381583	1.50677	1.50292	1.2686	915							125	152.779	0.0381583	0.12868	0.138333	0.116037	915		ppm-cm2 cm-2 d-1							0.0920428	915
					126	152.974	0.075325	1.21586	1.144	1.0966	435		Time weighted					126	152.974	0.075325	2.63652	2.38098	2.24077	435		Record	Record	Record					2.08129	435
					126	153.06	0.0940292	3.15256	3.11805	2.94312	435		mATN-cm2 cm-2 d-1					126	153.06	0.0940292	0.567037	0.718644	0.765395	435		B PL2 Flux	G PL2 flux	R PL2 flux	DEPTH				0.230479	435
					126	153.127	0.0379625	1.65712	1.68395	1.51419	435		Record	Record	Record			126	153.127	0.0379625	8.68449	8.11203	6.14236	435		2.20148	2.25117	1.82046	431.663		1.2787		4.81727	435
					127	153.316	0.0749292	0.305127	0.278217	0.269526	670		Matn Flux B	Matn Flux G	Matn Flux R	DEPTH		127	153.316	0.0749292	0.347007	0.283378	0.173918	670		1.01426	1.06992	0.938862	673.332		0.369797		1.01855	670
					127	153.401	0.094025	1.54828	1.44983	1.27123	670		1.81405	1.76052	1.60466	431.663		127	153.402	0.094025	0.216575	0.287396	0.208912	670		0.311776	0.485659	0.384908	897.497		0.242799		0.198228	670
					127	153.469	0.0382167	0.65777	0.649123	0.559055	670		3.08619	2.89327	2.57745	673.332		127	153.469	0.0382167	1.18058	1.05171	0.86106	670									1.6202	670
					128	153.694	0.0747125	0.181602	0.125959	0.121693	880		2.13086	2.00025	1.82987	897.497		128	153.695	0.0747125	-0.00359346	-0.0249899	-0.0125379	880									-0.198396	880
					128	153.78	0.0939333	4.34271	4.16486	3.89301	880							128	153.78	0.0939333	0.0785152	0.125822	0.0992838	880									0.0302103	880
					128	153.847	0.0385875	1.46053	1.40335	1.21657	880			in mmol C m-2 d-1				128	153.848	0.0385875	1.38363	1.38448	1.31112	880									0.986557	880
					129	154.041	0.0748958	0.290555	0.276661	0.248596	395			4.92944				129	154.041	0.0748958	0.645534	0.567015	0.48731	395									2.04949	395
					129	154.126	0.0940292	1.5322	1.46275	1.27414	395			8.10115				129	154.127	0.0940292	3.19769	3.22921	2.33527	395									2.20763	395
					129	154.194	0.0383542	0.424419	0.517273	0.386421	395			5.60071				129	154.194	0.0383542	0.92814	0.91484	0.79258	395									1.76858	395
					130	154.383	0.0748042	0.734331	0.713202	0.652559	635							130	154.384	0.0748042	0.257755	0.234032	0.194348	635									0.328142	635
					130	154.469	0.0939333	0.575282	0.587361	0.505287	635							130	154.469	0.0939333	0.347638	0.365562	0.292164	635									0.622381	635
					130	154.536	0.0385042	0.901053	0.948457	0.75409	635							130	154.536	0.0385042	0.546051	0.378757	0.281405	635									0.39934	635
						154.768	0.0560292	0.862345	0.704769	0.693039	860	not included						bad blank	153.695	-2.75105	-2.00424	-1.63934
																		bad blank	153.78	-1.32628	-0.510716	-0.356728
						hours	4.9753
																		swimmer effect	154.127	7.1549	7.19741	5.72564
						June 9 2015
						NH1301															NH1204
						BUOY-84		mATN-cm2 cm-2 d-1													ppm-cm2 cm-2 d-1
								1.8 hr	1.8 hr	1.8 hr											1.8 hr	1.8 hr	1.8 hr
						Bar center (d)	Bar width (d)	Matn Flux B	Matn Flux G	Matn Flux R	DEPTH (M)								D DAYS		ppm Flux B	ppm Flux G	ppm Flux R
					1	19.3074	0.0709042	3.15973	4.08859	3.29889	237								19.3074	0.0709042				237
					1	19.3743	0.0593417	4.27176	4.54545	3.73795	237								19.3747	0.0593417	2.45764	2.50616	2.1906	237	Average	2.17958	2.23521	2.04744
					1	19.4407	0.0709167	2.38676	2.56694	2.06232	237	Average	3.22047	3.58204	3.40795				19.4411	0.0709167	1.38539	1.61095	1.5249	237	BUOY/CFE	0.0206591	0.016864	0.0213423		about 2% of CFE
					1	19.5135	0.0711458	2.52503	2.7227	2.1493	237	BUOY/CFE	0.0379526	0.0468362	0.0502289		about 5% of CFE		19.5139	0.0711458	3.55047	3.42318	3.07221	237
					1	19.5806	0.0593417	2.48576	2.76128	2.1319	237								19.5809	0.0593417	1.34128	1.31016	1.28516	237
					1	19.647	0.0709167	2.01881	2.31131	1.78702	237								19.6473	0.0709167	1.84535	1.96231	1.86285	237
					1	19.7198	0.0711458	5.88188	5.73692	4.86965	237								19.7202	0.0711458	3.08483	3.00585	2.72812	237
					1	19.7809	0.0476167	4.35775	5.4482	9.60726	237								19.7813	0.0476167	3.9069	3.84691	3.49738	237
					1	19.8415	0.0607958	2.42096	2.67471	2.09973	237								19.8418	0.0607958	1.23036	1.48767	1.31688	237
					1	19.9143	0.059025	2.69622	2.96427	2.33544	237								19.9146	0.059025	0.814001	0.963748	0.94886	237
								avg POCATN FLUX	3.58204
								mmol -2 d-1	15.9401
